# Supplementary material for: Quantitative detection of C-deuterated drugs by CARS microscopy and Raman microspectroscopy
Source: Royal Society of Chemistry journal article supplement (doi:10.1039/c0an00956c), 2011-01-01

Electronic supporting information for

## Quantitative detection of C-deuterated drugs by CARS microscopy and Raman microspectroscopy

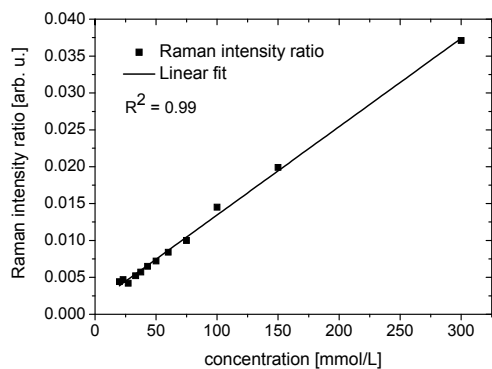

**Fig. S1** Concentration-dependent Raman measurements of  $d_5$ -etacrynic acid. The intensity ratio between the Raman band at  $2230\text{ cm}^{-1}$  and the band of the solvent DMSO at  $1045\text{ cm}^{-1}$  is plotted against the concentration.

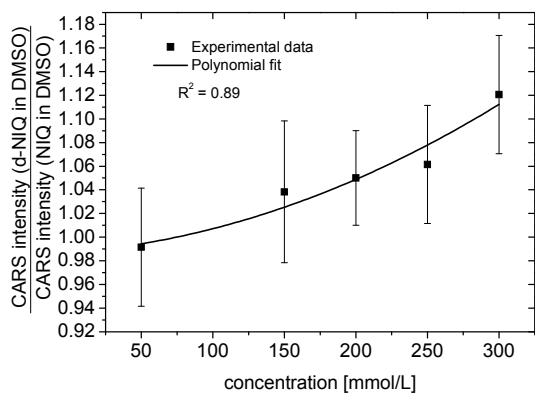

**Fig. S2** Concentration-dependent CARS measurements of  $d_5$ -NIQ dissolved in a  $15\text{ }\mu\text{M}$   $\beta$ -carotene solution in DMSO vs. dissolved undeuterated NIQ. The intensity ratio between the two channels is plotted against the concentration of dissolved  $d_5$ -NIQ.

Table S1. DFT calculated harmonic wavenumbers of C-D stretching vibrations in the region ~2100-2300  $\text{cm}^{-1}$  (compounds A-C in Fig. 1).

Compound A

| Wavenumber [ $\text{cm}^{-1}$ ] (intensity %) | Molecular subunit |
|-----------------------------------------------|-------------------|
| 2295 (3)                                      | Benzene ring      |
| 2298 (89)                                     | Benzene ring      |
| 2307 (100)                                    | Benzene ring      |
| 2316 (53)                                     | Benzene ring      |
| 2326 (96)                                     | Benzene ring      |

Compound B

| Wavenumber [ $\text{cm}^{-1}$ ] (intensity %) | Molecule part             |
|-----------------------------------------------|---------------------------|
| 2129 (7)                                      | $\text{CD}_2$ (acid part) |
| 2131 (12)                                     | $\text{CD}_3$ group       |
| 2154 (17)                                     | aliphat. $\text{CD}_2$    |
| 2203 (39)                                     | $\text{CD}_2$ (acid part) |
| 2207 (61)                                     | aliphat. $\text{CD}_2$    |
| 2243 (24)                                     | $\text{CD}_3$ group       |
| 2250 (100)                                    | $\text{CD}_3$ group       |
| 2250 (18)                                     | olefin. $\text{CD}_2$     |
| 2355 (36)                                     | olefin. $\text{CD}_2$     |

Compound C

| Wavenumber [ $\text{cm}^{-1}$ ] (intensity %) | Molecule part                        |
|-----------------------------------------------|--------------------------------------|
| 2126 (5)                                      | $\text{CD}_3$ (hexane part)          |
| 2131 (5)                                      | Hexane part                          |
| 2132 (8)                                      | $\text{CD}_3$ (butene part)          |
| 2134 (0)                                      | Hexane part                          |
| 2142 (9)                                      | Hexane part                          |
| 2144 (1)                                      | Hexane part                          |
| 2146 (1)                                      | $\text{CD}_2$ (acid part)            |
| 2154 (11)                                     | aliphat. $\text{CD}_2$ (butene part) |
| 2156 (13)                                     | Hexane part                          |
| 2186 (100)                                    | Hexane part                          |
| 2197 (1)                                      | Hexane part                          |
| 2206 (38)                                     | aliphat. $\text{CD}_2$ (butene part) |
| 2211 (27)                                     | Hexane part                          |
| 2218 (3)                                      | Hexane part                          |
| 2230 (22)                                     | $\text{CD}_2$ (acid part)            |
| 2238 (17)                                     | Hexane part                          |
| 2243 (15)                                     | aliphat. (butene part)               |
| 2244 (54)                                     | $\text{CD}_3$ (hexane part)          |
| 2246 (11)                                     | Hexane part                          |
| 2250 (64)                                     | Butene part                          |
| 2250 (13)                                     | Butene part                          |
| 2355 (23)                                     | olefin. $\text{CD}_2$                |

CA348Umk  
APROTON CDCl3 C:\calbert 24

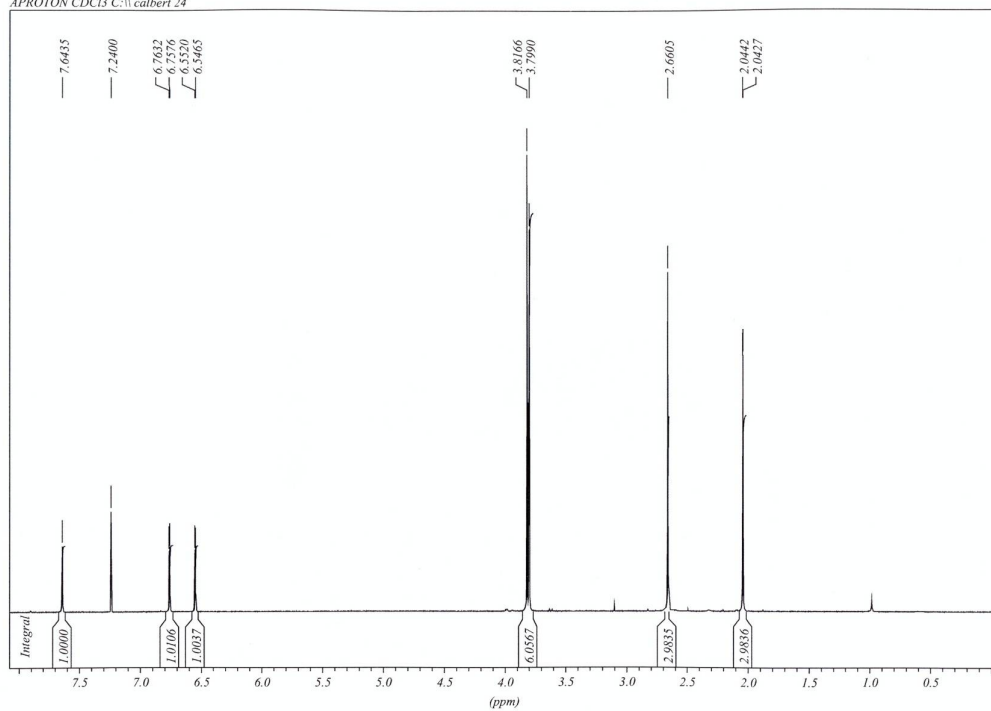

\*\*\* Current Data Parameters \*\*\*

NAME : ca348umk  
EXPNO : 20  
PROCNO : 1

CA348Umk  
AC13CPD CDCl3 C:\calbert 24

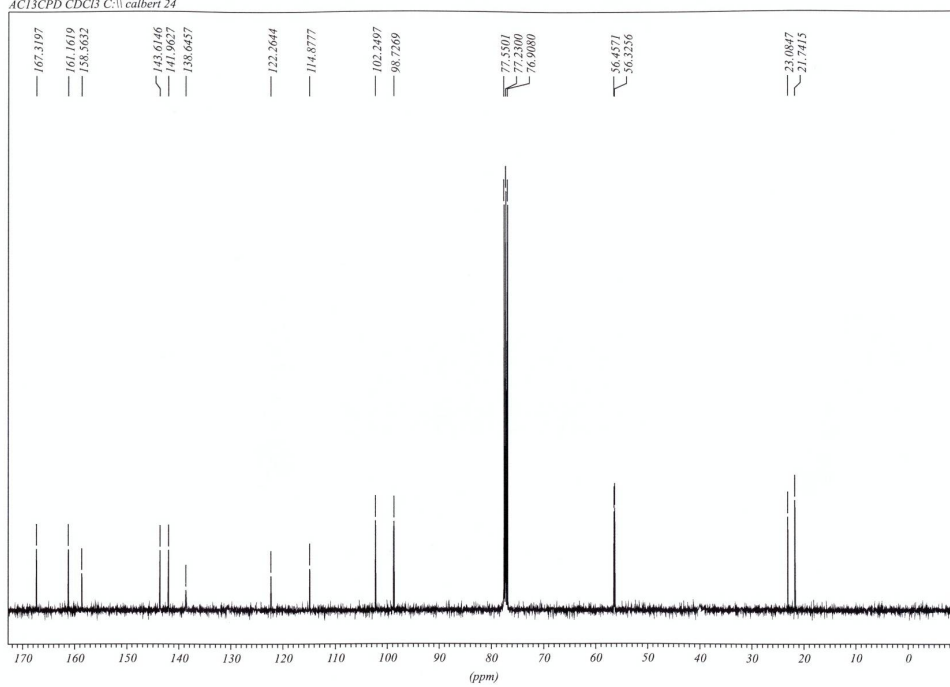

\*\*\* Current Data Parameters \*\*\*

NAME : ca348umk  
EXPNO : 21  
PROCNO : 1

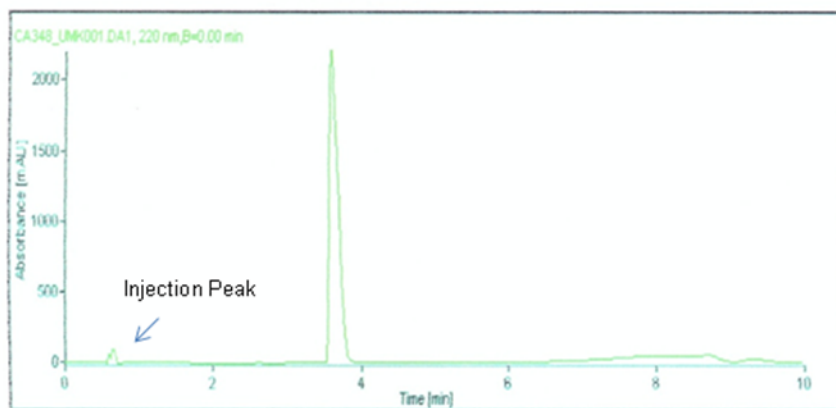

■ -1164,41 ■ 69,58 ■ 138,19 ■ 278,38 ■ 556,75 ■ 1113,51 ■ 2227,01 ■ 4454,03 [mAU]

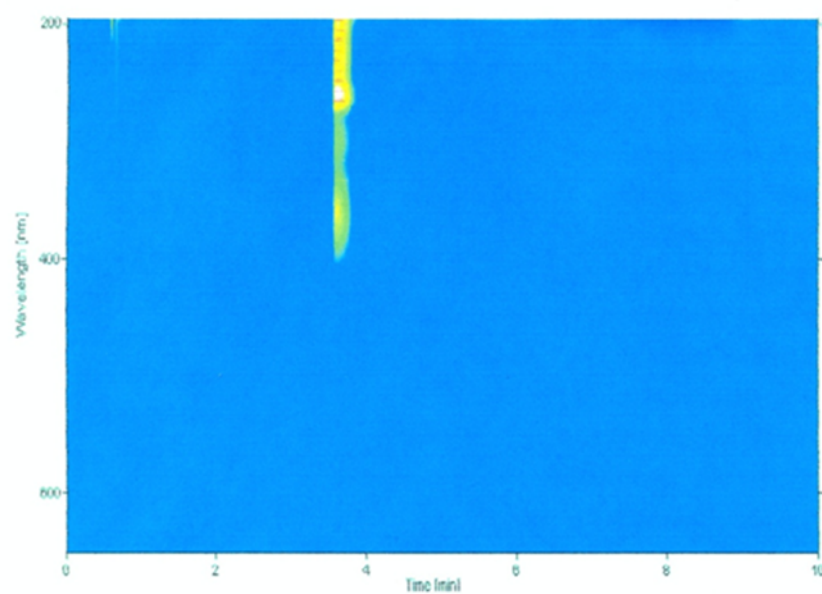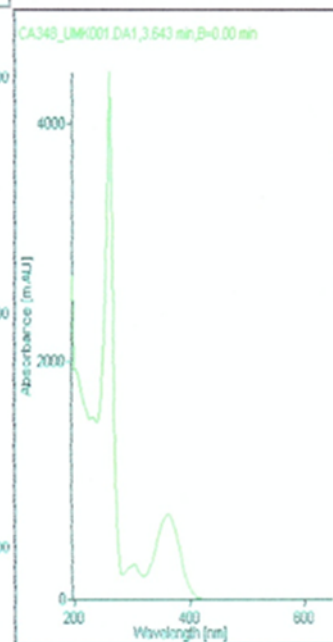

Supplement: c0an00956c.pdf [file c0an00956c.pdf]
